# Supplementary material for: The Drives for Driving Simulation: A Scientometric Analysis and a Selective Review of Reviews on Simulated Driving Research
Source: Front Psychol. 2020 May 27;11:917. doi: 10.3389/fpsyg.2020.00917 (PMC7266970; doi:10.3389/fpsyg.2020.00917)
Supplement: Supplementary file 4 [file Table_4.xlsx]

## Sheet: Tab_S4
	Cluster	Keyword	Title	Study	Topic	Discipline	Validity compared to on-road testing	Validity compared to laboratory testing	Fidelity	Systematic review	Critical issues
	1	Attention	Driving and neurologic disorders	Drazkowski and Sirven, 2011	Neurologic Disorders	Neurology	nd	nd	nd	1	1) These studies have not been validated to assess whether simulation tasks are predictive of increased crash rates 2) These simulators are not readily available for widespread clinical use
	1	Attention	Parkinson disease and driving: An evidence-based review	Crizzle, Classen, Uc, 2012	Major Neurocognitive disorders	Health Science	nd	Yes	nd	1	1) Predictors identified on the simulator can be further tested on the road although follow-up studies are needed to discern the concurrent validity between on-road tests and simulators
	1	Attention	Neural correlates of simulated driving while performing a secondary task: A review	Palmiero et al., 2019	Distraction fMRI	Health Science	nd	nd	nd	1	No critical issues regarding driving simulators
	1	Dementia	Driving and dementia: A review of the literature	Lloyd et al., 2001	Major Neurocognitive disorders	Occupational Therapy	No	nd	nd	1	1) Most studies examining driving simulators involved individuals with traumatic brain injuries and strokes and therefore the results cannot be generalized to the population of people with dementia
	1	Dementia	Driving and dementia: A review of the literature	Brown and Ott, 2004	Major Neurocognitive disorders	Psychiatry	Yes	Yes	nd	1	1) Driving simulators are not available 2) Older adults may not be comfortable with an electronic driving simulator on a large-scale basis 3) Further research needed to define valid and reliable office screening procedures for physicians to use in identifying those most at risk. Increased use of road testing or driving simulators with at-risk drivers whose status is unclear based on office examin…
	1	Dementia	Systematic review of driving risk and the efficacy of compensatory strategies in persons with dementia	Man-Son-Hing, Marshall, Molnar, Wilson, 2007	Major Neurocognitive disorders	Geriatry	Yes	nd	nd	1	1) No study has demonstrated that poor performance on road testing or driving simulator evaluations is predictive of future crashes
	1	Dementia	Brain morphometry and functional imaging techniques in dementia: methods, findings and relevance in forensic neurology	Kloppel, 2009	Major Neurocognitive disorders	Psychiatry	nd	Yes	nd	1	1) Data from cognitive testing are often readily available or can be acquired relatively easily in a clinical setting, whereas access to MRI compatible driving simulators or complex virtual world experiments is very limited 2) Need for a definition of present gold standard for the prediction of forensic questions (neuropsychological testing, simulation and provocation techniques and psychiatric f…
	1	Dementia	Car drivers with dementia: different complications due to different aetiologies?	Piersma, de Waard, Davidse, Tucha, Brouwer, 2016	Major Neurocognitive disorders	Psychology	Yes	Yes	nd	1	1) There is no proof yet that driving simulator performance predicts prospective crashes on road 2) Tolerability may be a problem because older people get often motion sick 3) A problem for older drivers, and drivers with dementia in particular, may be confusion when driving in a driving simulator instead of in their own car 4) Patients may have difficulty operating the driving simulator due to t…
	1	Driving simulation	Validation of driving simulators	Davison, Patel, Cunha, Schwiegerling, Muftuoglu, 2011	Vision	Ophthalmology	nd	nd	nd	1	No critical issues regarding driving simulation
	1	Driving simulation	Saccadic velocity as an arousal index in naturalistic tasks	Di Stasi, Catena, Canas, Macknik, Martinez-Conde, 2013	Workload/Fatigue	Psychology	nd	nd	nd	1	No critical issues regarding driving simulation
	1	Driving simulation	Inside the clinical evaluation of sleepiness: Subjective and objective tools	Baiardi and Mondini, 2019	Sleepiness	Medicine	Yes	Yes	nd	1	1) Simulators are not able to reliably predict real-life accidents, especially when results are evaluated on an individual level
	1	Driving simulation	Driving status of patients with generalized spike–wave on EEG but no clinical seizures	Antwi et al., 2019	Epilepsy and Driving	Neurology	nd	nd	nd	1	No critical issues regarding driving simulation
	1	Sleepiness	Neuropsychological function in obstructive sleep apnoea	Engleman and Joffe, 1999	Sleepiness	Medicine	Yes	Yes	nd	1	1) Need for producing a laboratory test of driving competence, validated against real-world data, and standardized for age, as an objective measurement of fitness to drive
	1	Sleepiness	Daytime sleepiness and its evaluation	Cluydts, De Valck, Verstraeten, Theys, 2002	Sleepiness	Psychology	No	nd	nd	1	1) The psychometric properties of these systems are not yet well established
	1	Sleepiness	Cognition and daytime functioning in sleep-related breathing disorders	Jackson, Howard, Barnes, 2011	Sleepiness	Health Science	nd	nd	nd	1	No critical issues regarding driving simulation
	1	Sleepiness	Diagnostic approach to sleep-disordered breathing	Thurnheer, 2011	Sleepiness	Pneumology	nd	nd	nd	1	No critical issues regarding driving simulation
	1	Sleepiness	Hypersomnolence and traffic safety	Gupta, Pandi-Perumal, Almeneessier, BaHammam, 2017	Sleepiness	Psychiatry	nd	nd	nd	1	1) Available methods of simulated driving cannot accurately predict the risk of accidents
	1	Sleepiness	Subjective and objective assessment of hypersomnia	Murray, 2017	Sleepiness	Neurology	nd	Yes	nd	1	1) There is no standard device because simulators are often developed for a variety of other driving safety considerations, and they may be large and expensive for better lifelike assessments
	1	Sleepiness	Determinants of policy decisions for non-commercial drivers with OSA: An integrative review	Rizzo et al., 2018	Sleepiness	Medicine	nd	nd	nd	1	1) Driving simulators are very expensive and not widely available
	1	Sleepiness	Driving simulators in the clinical assessment of fitness to drive in sleepy individuals: A systematic review	Schreier, Banks, Mathis, 2018	Sleepiness	Neurology	Mixed results	nd	nd	2	1) When driving performance is evaluated through quantitative performance measures, simulated driving is generally seen to be worse, with higher absolute values than real-road test driving, and therefore only relatively comparable. These discrepancies may be due to the risk present during real-road test driving 2) The large heterogeneity among driving simulator types and settings decreases intern…
	1	Sleepiness	Narrative review: Do spontaneous eye blink parameters provide a useful assessment of state drowsiness?	Cori, Anderson, Soleimanloo, Jackson, Howard, 2019	Sleepiness	Medicine	Yes	Yes	nd	1	No critical issues regarding driving simulation
	2	Alcohol	Using virtual reality to study alcohol intoxication effects on the neural correlates of simulated driving	Calhoun, Carvalho, Astur, Pearlson, 2005	Alcohol consumption	Psychiatry	Yes	nd	nd	1	No critical issues regarding driving simulation
	2	Alcohol	A selective review of simulated driving studies: Combining naturalistic and hybrid paradigms, analysis approaches, and future directions	Calhoun and Pearlson, 2012	Neuroimaging and Alcohol	Psychology	Yes	nd	Yes	1	1) Very few other studies of simulated driving have used connectivity or network-based approaches, it is critical for such studies to bring additional analytic approaches to bear in order to fully capitalize on the complexity of the functional dynamics involved
	2	Alcohol	The sensitivity of laboratory tests assessing driving related skills todose-related impairment of alcohol: A literature review	Jongen, Vuurman, Ramaekers, Vermeeren, 2016	Alcohol	Pharmacology	No	nd	nd	2	1) Driving simulators should be validated and compared head to head to naturalistic driving in order to increase construct validity
	2	Alcohol	A systematic review of the evidence for acute tolerance to alcohol – the “Mellanby effect”	Holland and Ferner, 2017	Alcohol	Medicine	nd	Yes	nd	2	No critical issues regarding driving simulation
	2	Alohol	Effects of acute alcohol consumption on measures of simulateddriving: A systematic review and meta-analysis	Irwin, Iudakhina, Desbrow, McCartney, 2017	Alcohol consumption	Health Science	Yes	nd	nd	3	1) Few studies provide sufficient level of detail regarding the driving scenarios to allow replication or comparison 2) Many studies also do not report all of the data captured by driving simulation software
	2	Driving	Cognitive dysfunction in sleep disorders	Fulda and Schulz, 2001	Sleepiness	Psychology	Mixed results	Mixed results	nd	1	1) More studies are needed to explore the ecological and predictive value of driving simulation performance
	2	Driving	Outcome measurement in sleep medicine practice and research. Part 2: assessment of neurobehavioral performance and mood	Weaver, 2001	Sleepiness	Nursing	nd	Yes	nd	1	No critical issues regarding driving simulation
	2	Driving	Are opioid-dependent/tolerant patients impaired in driving-related skills? A structured evidence-based review	Fishbain, Cutler, Rosomoff, Steele Rosomoff, 2003	Medication assumption	Psychiatry	nd	nd	nd	1	No critical issues regarding driving simulation
	2	Driving	Driving simulators in clinical practice	George, 2003	Sleepiness	Medicine	No	nd	Yes	1	1) Predicting accident risk in an individual patient remains problematic. Future research is needed to clarify which aspect(s) of performance measured from which driving simulators will be allow clinically useful predictions about driving risk
	2	Driving	Residual effects of sleep medication on driving ability	Verster, Veldhuijzen, Volkerts, 2004	Medication assumption	Pharmacology	No	nd	nd	1	No critical issues regarding driving simulation
	2	Driving	The assessment of driving abilities	Marcotte and Scott, 2004	Assessment of driving skills	Psychiatry	Yes	Mixed results	No	1	1) Even though participants may take the testing seriously, they are still aware that a simulator accident will not cause property damage or bodily injury and thus may not drive as cautiously as they might in the real world 2) Higher the realism higher the sickness
	2	Driving	Conversation effects on neural mechanisms underlying reaction time to visual events while viewing a driving scene: fMRI analysis and asynchrony model	Hsieh et al., 2009	Distraction fMRI	Communication science	nd	nd	nd	1	1) Careful investigation is needed as to whether the simulator paradigms employed produce data which are predictive of real-world driving performance
	2	Driving	Functional consequences of HIV-associated neuropsychological impairment	Gorman, Foley, Ettenhofer, Hinkin, van Gorp, 2009	Major Neurocognitive disorders(hiv)	Psychiatry	Yes	Yes	Mixed results	1	No critical issues regarding driving simulation
	2	Driving	Driving ability in Parkinson’s disease: Current status of research	Klimkeit, Bradshaw, Charlton, Stolwyk, Georgiou-Karistianis, 2009	Major Neurocognitive Disorders	Psychology	Yes	Yes	nd	1	1) Poor performance on driving simulators may reflect difficulties adapting to simulator technology, rather than poor driving performance per se 2) Studies utilising actual on-road performance measures (in addition to simulator driving performance) are crucial when attempting to fully understand driving performance in PD
	2	Driving	Phoning while driving II: A review of driving conditions influence	Collet, Guillot, Petit, 2010	Distraction	Psychology	Mixed results	nd	Mixed results	1	1) Using simulators to study distraction in a dual-task situation, the participants may encounter more difficulty in distinguishing between the main and the secondary task
	2	Driving	A review of driving simulator parameters relevant to the operation enduring freedom/operation Iraqi freedom veteran population	Kraft, Amick, Barth, French, Lew, 2010	Iraqi Veterans/DS's parameters operation	Medicine	Yes	Yes	yes	1	1) It is difficult to compare findings across driving simulator studies, limiting generalizability in the driving simulator literature; it makes it nearly impossible to establish a standardized set of normative data with which simulator data could be compared 2) A set of parameters that can be used across studies and with different simulators does not exist
	2	Driving	Zopiclone as positive control in studies examining the residual effects of hypnotic drugs on driving ability	Verster, Warren Spence, Shahid, Pandi-Perumal, Roth, 2011	Medication assumption	Pharmacology	Yes	Yes	nd	3	1) The current usefulness of driving simulators in evaluating driving impairment has not been clearly established. This is because driving simulators as well as the driving scenarios they employ are not standardized
	2	Driving	Systematic review of the quality and generalizability of studies on the effects of opioids on driving and cognitive/psychomotor performance	Mailis-Gagnon et al., 2012	Medication assumption	Medicine	nd	Mixed results	No	2	1) Driving simulators can vary in terms of visual and auditory input and sophistication, but a major problem is the high drop-out due to motion sickness
	2	Driving	Does personality predict driving performance in middle and older age? An evidence-based literature review	Nichols, Classen, McPeek, Breiner, 2012	Personality	Psychology	No	nd	nd	2	No critical issues regarding driving simulation
	2	Driving	Epilepsy and driving: Potential impact of transient impaired consciousness	Chen et al., 2013	Epilepsy	Neurology	Yes	nd	nd	1	1) Simulators data are limited in making generalizable conclusion
	2	Driving	Saccadic peak velocity as an alternative index of operator attention: A short review	Di Stasi, Marchitto, Antolì, Canas, 2013	Saccadic velocity/attention	Psychology	nd	nd	nd	1	No critical issues regarding driving simulation
	2	Driving	The impact of depression on driver performance	Wickens, Smart, Mann, 2014	Mental health	Health Science	Yes	nd	nd	1	No critical issues regarding driving simulation
	2	Driving	Driving in Parkinson’s disease	Özdilek and Uç, 2014	Major Neurodegenerative disorders	Neurology	nd	Yes	nd	1	1) Since the drivers know that they will not get hurt in an accident happening inside the simulator despite the realistic emulation of a car’s interior and driving conditions, their behaviors may show important differences 2) Another limitation of simulator vehicles is adaptation syndrome called “simulator sickness” which resembles motion sickness
	2	Driving	The racer’s brain – How domain expertise is reflected in the neural substrates of driving	Lappi, 2015	Neural substrates of driving	Psychology	nd	nd	nd	2	No critical issues regarding driving simulation
	2	Driving	Mirtazapine as positive control drug in studies examining the effects of antidepressants on driving ability	Verster, vandeLoo, Roth, 2015	Medication assumption	Pharmacology	nd	nd	nd	1	No critical issues regarding driving simulation
	2	Driving	High risk driving in treated and untreated youth with attention deficit hyperactivity disorder: Public health implications	Jillani and Kaminer, 2016	ADHD	Medicine	nd	nd	nd	2	No critical issues regarding driving simulation
	2	Driving	Driving with a neurodegenerative disorder: An overview of the current literature	Jacobs, Hart, Roos, 2017	Major Neurocognitive Disorders	Neurology	Yes	Yes	yes	1	1) The lower ecological validity of a simulator could be a disadvantage, because participants may prefer driving a real vehicle 2) It is also important to keep in mind that a reduction of driving performance measured with a simulator might reflect the adaption to the simulator itself and not actual driving ability 3) Dropouts in simulator studies have been related to simulator sickness, with up t…
	2	Driving	Covert hepatic encephalopathy: Can my patient drive?	Shaw and Bajaj, 2017	Hepatic Encephalopathy	Gastroenterology	nd	Yes	nd	1	No critical issues regarding driving simulation
	2	Driving	Smart in-vehicle technologies and older drivers: A scoping review	Classen et al., 2019	Aging	Occupational Therapy	No	nd	nd	2	1) The validity of using a simulator does not precisely represent real-world driving (i.e., ecological validity)
	2	Driving	Relationships between cognitive functions and driving behavior in Parkinson’s disease	Ranchet, Broussolle, Poisson, Paire-Ficout, 2012	Cognition and driving in Parkinson	Psychology	Yes	Yes	nd	1	No critical issues regarding driving simulation
	3	Driving simulator	The development of driving simulators: toward a multisensory solution	Pinto, Cavallo, Ohlmann, 2008	Development of driving simulator	Psychology	Mixed results	nd	Mixed results	1	1) The lack of validation studies 2) It is impossible to determine simulator's validity as a whole but only for specific tasks or applications 3) The lack of a consensus on the assessment methods
	3	Driving simulator	Rehabilitation of combat-returnees with traumatic brain injury	Lew, Rosen, Thomander, Poole, 2009	Rehabilitation	Medicine	Yes	Yes	Yes	1	1) There isn't any simulator study that provide test-retest reliability data for driving simulators 2) Lack of a common set of standards 3) Sensitivity and specificity of simulation tests in specific populations still need to be determined 4) Simulator sickness
	3	Driving simulator	Validation of driving simulators	Shechtman, 2010	Validation of driving simulators	Occupational Therapy	Mixed results	nd	Mixed results	1	1) Lack of consensus regarding the terminology used to describe and determine driving simulator validity 2) In simulation studies, content validity is limited to a specific simulator, specific driving task, specific populations that renders simulator validation difficult to generalize 3) Differences between studies in one or more: -type of brands; -driving tasks; - subject populations (small samp…
	3	Driving simulator	Nasal continuous positive airway pressure (nCPAP) treatment for obstructive sleep apnea, road traffic accidents and driving simulator performance: A meta-analysis	Antonopoulos, Sergentanis, Daskalopoulou, Petridou, 2011	Effect of nasal continuous positive airway pressure	Medicine	Yes	nd	nd	3	1) Lack of studies assessing simultaneously the effect of nCPAP on the driving simulator and in real life
	3	Driving simulator	Effects of adaptive cruise control and highly automated driving on workload and situation awareness: A review of the empirical evidence	de Winter, Happee, Martens, Stanton, 2014	Automated driving systems	Engineering	nd	nd	nd	2	1) Workload is typically higher in real cars compared to matched experiments in driving simulators. However, this effect does not generalize across different driving tasks 2) Simulators do not provide an accurate representation of the phenomenology of real automated driving. Two-thirds of the experiments reviewed have been conducted in fixed-base (i.e., low or medium fidelity) driving simulators,…
	3	Driving simulator	Establishing an evidence-base framework for driving rehabilitation in Parkinson’s disease: A systematic review of on-road driving studies	Devos, Ranchet, Akinwuntana, Uc, 2015	Major Neurocognitive disorders	Health Science	Yes	Yes	nd	2	1) However, it is unclear what the optimal training modalities (driving simulation vs cognitive rehabilitation) should be to ensure carryover and long-term retention of training to on-road driving and mobility
	3	Driving simulator	The impact of therapeutic opioid agonists on driving-related psychomotor skills assessed by a driving simulator or an onroad driving task: A systematic review	Ferreira, Boland, Phillips, Lam, Currow, 2017	Medication assumption	Medicine	Yes	Yes	nd	2	No critical issues regarding driving simulation
	3	Driving simulator	Evaluation method regarding the effect of psychotropic drugs on driving performance: A literature review	Iwata, Iwamoto, Kawano, Kawaue, Ozaki, 2018	Drugs consumption	Psychiatry	Mixed results	nd	No	1	1) In driving simulators, the equipment, scenarios, test times, and the evaluation indices have not been unified, so each research laboratory uses their own standard 2) A number of different scenarios are described, and it is therefore impossible to compare the results between different driving simulators directly 3) Motion sickness, which may affect measurements or interrupt the test
	3	Driving simulator	Efficacy of training with driving simulators in improving safety in young novice or learner drivers: A systematic review	Martín-delosReyes et al., 2019	Training for improving driving safety	Medicine	Mixed results	nd	nd	1	1) Despite the large number of studies on the use of driving simulators, few were designed with the aim of demonstrating their efficacy as learning tools for driving skills or to prevent traffic accidents 2) The results obtained were heterogeneous, inconclusive and could not be used to drawn a clear conclusion for or against the use of simulator-based programs to train learner or novice drivers
	3	Driving simulator	Bibliometric analysis of simulated driving research from 1997 to 2016	Guo, Lv, Liu, Wang, Duffy, 2019	Bibliometric analysis	Business	nd	nd	nd	1	No critical issues regarding driving simulation
